# Supplementary material
Source: Springer Nature journal article supplement (https://www.springermedizin.de/resource/supplementary/12916_2009_210_MOESM7_ESM.pdf/9599400)

Review: Clinical pathway and total hip and knee arthroplasty

Comparison: 04 Care Pathway vs standard care

Outcome: 01 Discharge to home

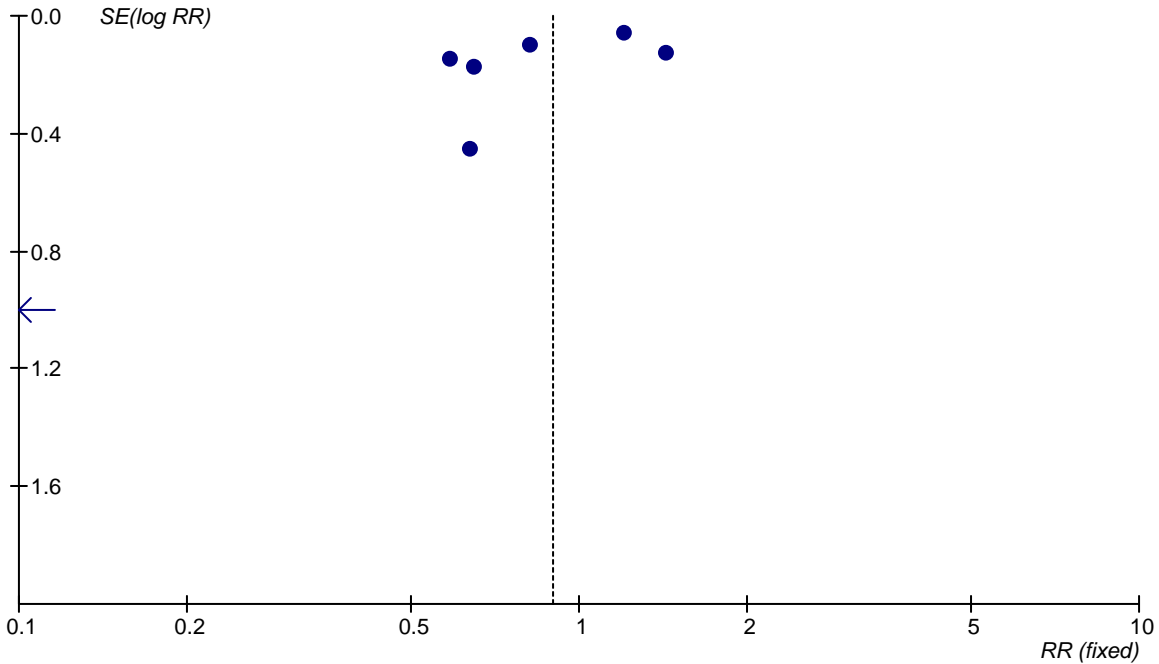

Supplement: MOESM7 [file 9599400]
